# Supplementary material for: Choroidal Medium-Large Vascular Index: A Novel OCTA Biomarker for Assessing Activity in Thyroid Eye Disease
Source: Research Square preprint supplement (doi:10.21203/rs.3.rs-8242113/v1), 2025-12-22
Supplement: Supplementary file 1 [file 9b034f9ef0e2701c6770e05e.docx]

**Supplementary Table 1: Comparison of Retinal and Choroidal Thickness in Different Phases of TED and Healthy Eye Groups (μm)**

|  |  |  | Group A  Control  (n=50 eyes) | Group B  Inactive-TED (n=47 eyes) | Group C  Active-TED (n=50 eyes) | *P*Value | *P*Value | | | | | |
| --- | --- | --- | --- | --- | --- | --- | --- | --- | --- | --- | --- | --- |
| A&B | | B&C | | A&C | |
| Retinal Thickness | **Fovea** | | **239.50±17.84** | **244.24±20.59** | **238.40±19.70** | **0.288** | **0.224** | | **0.141** | | **0.781** | |
| Para-fovea | N | 366.24±16.73 | 361.00±19.99 | 358.64±22.83 | 0.155 | 0.199 | | 0.562 | | 0.059 | |
| S | 364.42±14.74 | 359.04±14.62 | 355.20±23.18 | 0.081 | 0.144 | | 0.296 | | 0.012***** | |
| T | 349.44±11.97 | 348.64±13.59 | 345.46±22.33 | 0.112 | 0.349 | | 0.137 | | 0.041 | |
| I | 355.28±13.01 | 353.68±17.53 | 351.62±19.73 | 0.361 | 0.306 | | 0.551 | | 0.126 | |
| **Avg.** | **357.35±12.41** | **355.59±15.23** | **352.73±20.99** | **0.284** | **0.295** | | **0.198** | | **0.091** | |
| Peri-  fovea | N | 343.16±16.22 | 341.56±20.80 | 338.66±23.36 | 0.163 | 0.406 | | 0.483 | | 0.091 | |
| S | 324.34±14.32 | 325.02±17.17 | 322.48±22.47 | 0.108 | 0.492 | | 0.096 | | 0.117 | |
| T | 312.32±20.11 | 311.55±14.66 | 311.04±16.70 | 0.934 | 0.828 | | 0.884 | | 0.713 | |
| I | 313.16±13.17 | 311.98±14.78 | 314.26±18.08 | 0.109 | 0.102 | | 0.088 | | 0.723 | |
| **Avg.** | **326.25±12.83** | **322.34±17.25** | **320.80±14.91** | **0.189** | **0.198** | | **0.619** | | **0.078** | |
| Choroidal Thickness | **Fovea** | | **233.38±43.41** | **239.02±44.32** | **269.86±42.75** | **<0.001***** | | **0.729** | | **<0.001***** | | **<0.001***** | |
| Para-fovea | N | 232.18±49.84 | 246.49±40.62 | 265.54±58.85 | 0.004** | 0.556 | | 0.028 | | 0.003 | |
| S | 245.58±47.87 | 238.94±43.39 | 265.50±52.81 | 0.008** | 0.782 | | 0.016* | | 0.006** | |
| T | 234.52±47.78 | 229.62±42.45 | 254.70±55.20 | 0.013* | 0.861 | | 0.024* | | 0.011* | |
| I | 244.78±46.55 | 248.79±41.48 | 259.94±58.57 | 0.186 | 0.892 | | 0.382 | | 0.203 | |
| **Avg.** | **239.27±47.89** | **240.96±42.24** | **261.42±56.21** | **0.004**** | **0.992** | | **0.008**** | | **0.005**** | |
| Peri-  fovea | N | 217.64±48.41 | 229.64±59.90 | 232.58±59.18 | 0.152 | 0.218 | | 0.953 | | 0.134 | |
| S | 257.04±48.03 | 249.30±63.80 | 275.02±53.50 | 0.021* | 0.732 | | 0.018 | | 0.048* | |
| T | 246.86±47.32 | 259.72±56.74 | 264.42±54.17 | 0.038* | 0.087 | | 0.842 | | 0.026* | |
| I | 245.20±46.72 | 251.13±52.88 | 263.00±54.79 | 0.016* | 0.682 | | 0.132 | | 0.013* | |
| **Avg.** | **241.69±47.62** | **247.45±58.33** | **258.76±55.45** | **0.009**** | **0.592** | | **0.148** | | **0.007**** | |

**P* < 0.05, ***P* < 0.01, ****P* < 0.001.

**Supplementary Table 2: Comparison of Retinal Vascularity Index in Different Phases of TED and Healthy Control Groups (%)**

| · |  |  | Group A  Control(n=50) | Group B  Inactive-TED (n=47) | Group C  Active-TED (n=50) | *P*Value | *P*Value | | |
| --- | --- | --- | --- | --- | --- | --- | --- | --- | --- |
| A&B | B&C | A&C |
| Retinal Superficial Vascularity Index | **Fovea** | | **28.12±****4.23** | **27.40±****5.10** | **25.58±5.15** | **0.026*** | **0.468** | **0.083** | **0.007**** |
| Para-fovea | N | 38.08±4.13 | 37.04±4.38 | 36.83±4.21 | 0.297 | 0.223 | 0.808 | 0.149 |
| S | 39.34±4.14 | 38.36±3.95 | 37.17±4.99 | 0.053 | 0.264 | 0.182 | 0.016* |
| T | 38.30±4.42 | 36.16±4.98 | 35.02±4.96 | 0.003** | 0.027* | 0.244 | <0.001*** |
| I | 39.56±4.16 | 38.76±4.41 | 36.89±5.50 | 0.019* | 0.397 | 0.053 | 0.006** |
| **Avg.** | **38.87±3.96** | **37.58±3.79** | **36.05±4.41** | **0.041*** | **0.715** | **0.065** | **0.011*** |
| Peri-fovea | N | 41.82±3.93 | 41.36±3.22 | 40.49±3.51 | 0.181 | 0.520 | 0.232 | 0.068 |
| S | 43.00±3.46 | 42.58±3.46 | 41.64±3.80 | 0.163 | 0.557 | 0.196 | 0.063 |
| T | 39.92±3.40 | 38.28±3.93 | 37.38±3.90 | 0.040* | 0.030* | 0.241 | 0.010* |
| I | 42.96±3.80 | 43.19±3.39 | 42.49±3.62 | 0.631 | 0.521 | 0.347 | 0.761 |
| **Avg.** | **41.35±3.58** | **40.50±3.11** | **38.87±3.96** | **0.061** | **0.332** | **0.158** | **0.019*** |
| Retinal Deep Vascularity Index | **Fovea** | | **21.30±5.20** | **19.20±5.46** | **19.66±5.79** | **0.141** | **0.055** | **0.626** | **0.072** |
| Para-fovea | N | 40.80±3.57 | 39.26±5.12 | 39.36±3.93 | 0.133 | 0.075 | 0.903 | 0.092 |
| S | 41.12±3.19 | 40.23±3.59 | 39.86±3.85 | 0.194 | 0.221 | 0.605 | 0.078 |
| T | 40.88±3.64 | 40.11±4.40 | 39.90±4.66 | 0.482 | 0.372 | 0.812 | 0.251 |
| I | 41.80±3.19 | 40.79±3.66 | 41.10±3.85 | 0.360 | 0.166 | 0.668 | 0.329 |
| **Avg.** | **41.15±3.12** | **40.10±3.63** | **40.21±3.63** | **0.255** | **0.136** | **0.877** | **0.175** |
| Peri-fovea | N | 42.12±4.00 | 41.51±2.96 | 40.58±2.95 | 0.072 | 0.372 | 0.174 | 0.023* |
| S | 41.66±3.91 | 41.77±2.59 | 40.46±3.51 | 0.109 | 0.878 | 0.060 | 0.079 |
| T | 41.30±4.09 | 41.13±3.29 | 39.70±3.53 | 0.061 | 0.817 | 0.077 | 0.051 |
| I | 42.48±4.32 | 41.94±3.44 | 40.88±3.02 | 0.086 | 0.463 | 0.155 | 0.059 |
| **Avg.** | **41.89±3.92** | **41.59±2.56** | **40.41±2.95** | **0.054** | **0.641** | **0.172** | **0.082** |

**P* < 0.05, ***P* < 0.01, ****P* < 0.001.

**Supplementary Table 3: Comparison of Choroidal Vascularity Index in Different Phases of TED and Healthy Control Groups (%)**

|  |  |  | Group A  Control(n=50) | Group B  Inactive-TED (n=47) | Group C  Active-TED (n=50) | *P*Value | *P*Value | | |
| --- | --- | --- | --- | --- | --- | --- | --- | --- | --- |
| A&B | B&C | A&C |
| Choroidal Capillary Vascularity Index | | **Fovea** | | **48.28±2.00** | **47.84±2.50** | **48.26±1.95** | **0.152** | **0.382** | **0.418** | **0.991** |
| Para-fovea | N | 46.58±2.16 | 45.72±2.82 | 46.40±3.35 | 0.294 | 0.632 | 0.266 | 0.984 |
| S | 46.36±2.14 | 45.34±2.91 | 45.24±3.14 | 0.086 | 0.998 | 0.153 | 0.115 |
| T | 46.64±2.27 | 46.04±3.28 | 46.34±3.35 | 0.620 | 0.961 | 0.660 | 0.937 |
| I | 47.12±2.19 | 46.45±2.47 | 46.68±4.18 | 0.448 | 0.710 | 0.219 | 0.806 |
| **Avg.** | **46.78±1.51** | **45.89±2.09** | **46.17±2.63** | **0.109** | **0.919** | **0.056** | **0.398** |
| Peri-fovea | N | 47.32±2.35 | 46.60±2.34 | 47.42±2.36 | 0.176 | 0.239 | 0.345 | 0.995 |
| S | 46.76±2.69 | 46.36±2.15 | 46.26±2.73 | 0.586 | 0.996 | 0.806 | 0.736 |
| T | 47.48±2.31 | 47.09±2.03 | 47.36±2.26 | 0.667 | 0.896 | 0.753 | 0.991 |
| I | 47.32±2.49 | 46.44±2.29 | 46.96±2.38 | 0.201 | 0.630 | 0.210 | 0.844 |
| **Avg.** | **47.22±1.95** | **46.62±1.96** | **47.00±1.90** | **0.267** | **0.638** | **0.266** | **0.920** |
| Choroidal Medium-large Vascularity Index | **Fovea** | | **37.96±6.58** | **37.25±6.39** | **43.97±5.98** | **<0.001***** | **0.933** | **<0.001***** | **<0.001***** |
| Para-fovea | N | 40.50±5.22 | 40.89±5.99 | 44.06±5.95 | 0.004* | 0.736 | 0.007** | 0.002** |
| S | 39.66±5.04 | 38.09±5.58 | 43.30±5.92 | <0.001*** | 0.163 | <0.001*** | 0.001** |
| T | 37.98±5.42 | 37.02±4.78 | 41.58±5.28 | <0.001*** | 0.440 | <0.001*** | 0.001** |
| I | 38.02±5.78 | 40.26±5.68 | 42.88±6.91 | <0.001*** | 0.075 | 0.035 | <0.001*** |
| **Avg.** | **38.51±4.01** | **39.75±4.95** | **42.96±4.88** | **<0.001***** | **0.154** | **<0.001***** | **<0.001***** |
| Peri-fovea | N | 44.50±5.74 | 44.70±4.55 | 44.30±6.02 | 0.937 | 0.996 | 0.976 | 0.998 |
| S | 39.38±4.91 | 41.52±4.55 | 42.80±5.22 | 0.046* | 0.029* | 0.202 | 0.001** |
| T | 38.78±5.30 | 37.76±5.11 | 39.30±4.15 | 0.294 | 0.308 | 0.124 | 0.595 |
| I | 40.49±3.93 | 41.75±4.54 | 42.08±4.95 | 0.080 | 0.141 | 0.733 | 0.078 |
| **Avg.** | **40.24±4.07** | **41.64±5.03** | **43.22±5.29** | **0.010*** | **0.134** | **0.136** | **0.002**** |

**P* < 0.05, ***P* < 0.01, ****P* < 0.001.
